1 **Stabilisation of soil organic matter with rock dust partially**  
2 **counteracted by plants**

3 Wolfram Buss<sup>a\*</sup>

4 Heath Hasemer<sup>a</sup>

5 Scott Ferguson<sup>a</sup>

6 Justin Borevitz<sup>a</sup>

7 <sup>a</sup> Research School of Biology, Australian National University, 134 Linnaeus Way, 2601 Canberra, Australia

8 \*corresponding author: [wolfram.buss@anu.edu.au](mailto:wolfram.buss@anu.edu.au)

## 9 **Abstract**

10 Soil application of Ca- and Mg-rich silicates can capture and store atmospheric carbon  
11 dioxide as inorganic carbon but could also have the potential to stabilise soil organic matter  
12 (SOM). Synergies between these two processes have not been investigated. Here, we apply  
13 finely ground silicate rock mining residues (basalt and granite blend) to a loamy sand in a pot  
14 trial at a rate of 4% (equivalent to 50 t ha<sup>-1</sup>) and investigate the effects of a wheat plant and  
15 two watering regimes on soil carbon sequestration. Rock dust addition increased soil pH,  
16 electric conductivity and soil-exchangeable Ca and Mg contents, as expected for weathering,  
17 but decreased exchangeable levels of micronutrients Mn and Zn, likely related to soil pH.  
18 Importantly, it increased mineral-associated organic matter by 22% due to the supply of  
19 secondary minerals and associated sites for SOM sorption. Additionally, in the non-planted  
20 treatments, rock supply of Ca and Mg increased soil microaggregation that subsequently  
21 stabilised labile particulate organic matter as organic matter occluded in aggregates by 46%.  
22 Plants, however, reduced soil exchangeable Mg and Ca contents and hence counteracted the  
23 silicate rock effect on microaggregates and carbon within. We attribute this cation loss to  
24 plant exudates released to solubilise micronutrients and hence neutralise plant deficiencies.  
25 The effect of enhanced silicate rock weathering on SOM stabilisation could substantially  
26 boost its carbon sequestration potential when pH and micronutrient effects are considered.

## 27 **1 Introduction**

28 Urgent action is required to avoid the most dangerous impacts of climate change. Such action  
29 must include both significant reduction in greenhouse gas emissions, and atmospheric  
30 greenhouse gas removal largely via land change (IPCC, 2022). Several promising greenhouse  
31 gas removal methods are based on utilising natural cycles to capture and store atmospheric  
32 carbon dioxide (Buss, Yeates, et al., 2021; Fuss et al., 2018). These include soil organic  
33 carbon from plants and enhanced rock weathering.

34 During natural weathering of Ca- and Mg-rich silicates, bicarbonate ( $\text{HCO}_3^-$ ) is formed,  
35 capturing  $\text{CO}_2$  from the atmosphere (largely as  $\text{CO}_2$  respired from plants and soil  
36 microorganisms) (Beerling et al., 2018; Hartmann et al., 2013). Follow-up reactions can  
37 produce solid carbonates that sequester carbon for the long-term. The mafic rock basalt is one  
38 of the most promising rock types for large-scale carbon capture and storage since it is  
39 abundant, weathers rapidly and is low in heavy metal contaminants potentially harmful for  
40 soil and plant growth. The weathering rates are highly dependent on rock particle size; 1 mm  
41 sized spheres of even the most reactive Ca- and Mg-rich silicates take thousands of years to  
42 dissolve (Hartmann et al., 2013). However, grinding rocks to a particle size of  $<100 \mu\text{m}$  can  
43 result in weathering and carbon drawdown on a societal relevant scale (Holdren & Speyer,  
44 1985; Renforth, 2012). Unfortunately, across multiple studies into the weathering rates of Ca-  
45 and Mg-rich silicates in systems reflecting natural soil-plant conditions,  $\text{CO}_2$  sequestration  
46 rates were measured differently and varied by a factor of 1,000 (Amann et al., 2020; Haque et  
47 al., 2019, 2020; Kelland et al., 2020; ten Berge et al., 2012). This demonstrates the need for  
48 further studies that investigate enhanced weathering of globally available materials, such as  
49 mining residues, using field soils and plants but grown in controlled conditions and measured  
50 consistently across multiple interacting factors.

51 Soil organic carbon exists in natural systems as soil organic matter (SOM) and typically  
52 enters the soil system as plant-derived particulate organic matter (POM), which is labile and  
53 easily decomposed (Lavallee et al., 2020; Poeplau et al., 2018). Soil aggregates can  
54 physically protect POM, which is called aggregated organic matter (AggOM), and minerals  
55 can sorb partially decomposed POM fragments, so-called dissolved organic matter (DOM), to  
56 its surfaces to form mineral-associated organic matter (MAOM) (Abramoff et al., 2018;  
57 Hemingway et al., 2019; Poeplau et al., 2020). Both processes increase the retention and  
58 stability of SOM in soil. Soil aggregates are formed through various soil processes that bind  
59 together soil particles, such as activity from fungi hyphae and roots, or soil cementing agents,  
60 including Ca, Mg, Al and Fe (Amezketta, 1999). The main components of soil responsible for  
61 MAOM formation are clay and short-order Fe and Mn minerals formed from weathering of  
62 primary minerals (Kleber et al., 2015; Singh et al., 2018). Polyvalent cations, such as Ca, Mg,  
63 Al and Fe, also have a key function in facilitating sorption of DOM to mineral surfaces  
64 through cation bridging; the connection of (predominantly) negatively charged clay surfaces  
65 with negative functional groups of DOM (Kleber et al., 2015; Singh et al., 2018).

66 Synergies between enhanced rock weathering for both the formation of inorganic carbon for  
67 direct carbon drawdown and the formation of secondary minerals and polyvalent cations for  
68 stabilisation of SOM could significantly enhance its carbon sequestration potential and have  
69 soil health co-benefits. Yet studies in this area that investigate the factors that influence its  
70 potential are lacking.

71 Both rock weathering rates and SOM formation and decomposition reactions are affected by  
72 soil water availability and plant activity. Higher precipitation and increased water flow  
73 accelerates rock weathering (Brady et al., 1999; G. Li et al., 2016; White & Blum, 1995) and  
74 water availability also governs microbial processes responsible for SOM decomposition and  
75 affects plants that supply carbon into soil. Therefore, precipitation has a strong effect on

76 SOM levels (Luo et al., 2017) and the SOM content is typically higher in areas with more  
77 precipitation (Alvarez, 2005; Wiesmeier et al., 2019). Plants can significantly increase rock  
78 weathering rates by up 10-fold (Bormann et al., 1998; Cochran & Berner, 1996; Hinsinger et  
79 al., 2001). Plants also provide the foundation for SOM formation through rhizodeposits from  
80 living plants and litter from dead plants. Yet, they can also accelerate the decomposition of  
81 existing SOM through various processes summarised under the term positive priming  
82 (Keiluweit et al., 2015; Kuzyakov, 2010). The effects of plants and water could significantly  
83 influence the potential synergies of rock weathering on SOM and inorganic carbon  
84 sequestration.

85 In this study, to simulate potential field conditions, bulk mining residues (basalt, granite  
86 blend) were applied to a sandy loam and field climatic conditions were replicated in a growth  
87 chamber under controlled conditions. The effects of wheat plants and watering on rock  
88 weathering, microbial composition and SOM content of different stability were investigated.  
89 Further, the soil available and plant tissue elemental contents were analysed to understand the  
90 mechanisms behind the soil response. The hypothesis was that weathering of Ca- and Mg-  
91 rich silicates can increase both inorganic and organic carbon storage.

## 92 **2 Materials and Methods**

### 93 **2.1 Soil and rock samples**

94 The soil was agricultural topsoil (0-20 cm) sourced in 2020 from Young in central New  
95 South Wales, Australia. The soil was dried and stored for ~12 months before it was used in  
96 the incubation trial. It had a pH (in water) of 5.68 and was classified as loamy sand (USDA  
97 classification). The cation exchange capacity was  $2.3 \text{ cmol}_+ \text{ kg}^{-1}$  and the total carbon and  
98 nitrogen contents were 0.88% and 0.045%, respectively. More details about the soil with full  
99 characterisation can be found in SI Table 1.

100 The rock mining residues were sourced from Victoria in Australia (Cohuna and Carisbrook)  
101 and comprise of both basalt and granite. The rock was ground with a pug mill and sieved to  
102  $<90 \mu\text{m}$  with a p80 (80% of particles with a diameter less than specified size) of  $50 \mu\text{m}$ . Data  
103 on X-ray diffraction and full acid digestion followed by inductively coupled plasma (ICP) –  
104 mass spectrometry (method ME-MS61 using perchloric, nitric, hydrofluoric and hydrochloric  
105 acids) and particle size using a Mastersizer 2000 (Malvern Panalytical; Malvern, UK) are  
106 shown in Table 1 and full particle size distribution of both materials in SI Figure 1.

### 107 **2.2 X-ray diffraction of rock sample**

108 Samples were pre-ground and sieved to  $<90 \mu\text{m}$ , then spiked with 20 wt%  $\text{Al}_2\text{O}_3$  (Baikalox  
109 polishing corundum) and manually ground finely in an agate mortar in acetone. The  
110 suspension was pipetted on low-background holders (quartz), and dried. Powder X-ray  
111 diffraction analysis was carried out with a Malvern Panalytical Empyrean Series 3  
112 diffractometer that was equipped with Bragg-Brentano<sup>HD</sup> divergent beam optic and a  
113 PIXcel<sup>3D</sup> detector (1D scanning mode,  $3.347^\circ$  active length), using *CoK $\alpha$*  radiation. Samples  
114 were analysed over a range of  $4\text{-}85^\circ 2q$ , with step width of  $0.0131303^\circ 2q$  and a total dwell  
115 time of 98 s/step, while spinning samples horizontally. Phase identification was carried out

116 with the software *DiffraPlus* Eva 10 (2004; Bruker AXS GmbH, Karlsruhe, Germany) and  
117 ICDD PDF-2 database (2004; PDF-2. International Centre for Diffraction Data, Newtown  
118 Square, PA, USA), and quantification with *Siroquant V4* (Taylor, 1991) and *Highscore Plus*  
119 4.8 (2018; Malvern Panalytical B. V., Almelo, The Netherlands).

## 120 **2.3 Soil incubation / wheat plant trial**

121 The soil was sieved to <10 mm to remove large root and other plant structures. Soil or  
122 crushed rock-soil mix (1.2 kg total) was filled into round pots 11 cm diameter and 11 cm high  
123 with drain holes. Crushed rock was pre-mixed with the soil in ziplock bags at a rate of ~4%  
124 w/w (equivalent to 50 t ha<sup>-1</sup>). After watering, pre-germinated wheat seedlings (*Triticum*  
125 *aestivum*, Condo variety) were planted into the centre of the pots (half of the pots were  
126 planted).

127 A full-factorial design with treatments of rock/no rock, wheat/no wheat and low/high water  
128 was used with 8 pot replicates (64 pots in total). No fertiliser was applied, and the pots were  
129 kept in a growth chamber in a randomised block design for ~6 months simulating the diurnal  
130 and seasonal light and temperature regime of central New South Wales, Australia, the origin  
131 of the soil (temperature profile of ~8-10°C at night and ~18-25°C during the day). Pots were  
132 watered with pre-determined amounts of tap water depending on high and low water  
133 treatments. The high-water treatment received 100 mL of water three times a week and the  
134 low water treatment 100 mL and 50 mL water each week. In some weeks lower/high  
135 watering was necessary depending on plant growth stage resulting in 7 L and 4 L of water in  
136 total for the high- and low-water treatments, which corresponds to ~740 and 420 mm  
137 precipitation over the 6 months. This is approximately equivalent to the annual lower and  
138 higher end of the precipitation in the area the soil and light/temperature regime were adapted  
139 from.

140 At the end of the ~6 month-period, the plants and their roots were pulled out of the soil and  
141 partitioned into roots, shoots and head (seeds/grain), dried at 105°C and weighed. Centrifuge  
142 tubes (50 mL) were used to take soil samples from the area under the plant at harvest (3 cm  
143 deep core). The soil samples were dried in the oven at 40°C for 3 days.

## 144 **2.4 Soil analysis**

### 145 **2.4.1 Carbon analysis**

146 A soil subsample (~400 mg) was ground, and the contents of carbon and nitrogen were  
147 determined with a VarioMax 3000 (Elementar, Germany) (peak anticipated N: 210 s, oxygen  
148 dosing time: 15 s, oxygen dosing: 70 ml min<sup>-1</sup>, furnace temperatures: 900°C, 900°C and  
149 830°C; helium as carrier gas). The inorganic carbon content was determined through prior  
150 soil acidification using 1 M HCl until no gas release was visible.

### 151 **2.4.2 Three-pool soil carbon fractionation**

152 Full details about the soil carbon fractionation that distinguishes free POM, AggOM and  
153 MAOM is described previously (Buss, Sharma, et al., 2021). In short: 10 g of soil was shaken  
154 with a total volume of 50 mL of deionised water. Wet sieving was performed using 70 µm  
155 sieves. For separating POM and AggOM sodium iodide adjusted to a density of 1.8 g cm<sup>-3</sup>  
156 was used. <sup>33</sup>The samples were centrifuged at 3000 rpm for 10 min and POM and AggOM  
157 were separated by decanting the content of the tube onto a Whatman No. 2 filter paper. To  
158 remove sodium iodide residues, the AggOM fraction was washed with deionised water. The  
159 MAOM fraction (derived from the sieving step; <70 µm) was separated from the liquid  
160 fraction via centrifugation at 3000 rpm for 30 min.

161 The carbon content within each fraction was analysed using a combustion method (details  
162 above). The aqueous fraction was analysed for electric conductivity (EC) with a ProLab 5000  
163 pH/EC meter (SI Analytics; Germany) and a suite of elements using ICP (details about ICP



164 below). The elemental content determined in this fraction is referred to as “water-extractable  
165 content” in the following.

### 166 **2.4.3 Two-pool soil carbon fractionation**

167 The AggOM fraction comprises both occluded POM, protected from decomposition, but also  
168 aggregated clay and silt particles that contain sorbed carbon (MAOM), sourced from either  
169 plant exudates or residual POM decomposition (SI Figure 2). To further separate AggOM  
170 into occluded (and free) POM and MAOM, so to investigate whether indeed carbon was  
171 occluded in aggregates or whether it was only sorbed to the extra mineral surfaces provided  
172 by the weathered rock, a second fractionation based on previous work (Cotrufo et al., 2019)  
173 with some modifications was applied on a subset of samples (no rock-no plant; rock-no plant;  
174 rock-plant).

175 A solution with 0.5% hexameta phosphate was prepared, and 30 mL added to 50 mL  
176 centrifuge tubes that contained 2.5 g of soil and 2 glass beads. The tubes were shaken at 150  
177 rpm for 18 hours and then sieved through 70  $\mu\text{m}$  sieves (free and occluded POM). The  
178 MAOM fraction was subsequently separated from the aqueous fraction through  
179 centrifugation at 3000 rpm for 30 min. The free and occluded POM, MAOM and aqueous  
180 fraction were all analysed for their carbon content.

### 181 **2.4.4 ICP-Optical Emission Spectroscopy (ICP-OES)**

182 The aqueous fractions recovered from the fractionation described under 2.3.2 were analysed  
183 with an ICP-OES 5110 (Agilent; Santa Clara, CA, USA) for 20 elements. The ICP multi-  
184 element standard solution Intelliquant No.1 and 2 from Agilent were used for calibration  
185 using following concentrations: calibration blank, 0.01, 0.05, 0.1, 0.01, 1, 5, 10 and 50 mg L<sup>-1</sup>.  
186 <sup>1</sup>. The 1 ppm standard was used as internal quality control.

#### 187 **2.4.5 Soil aggregation test**

188 Soil aggregation was tested on a sub-set of samples (no rock-no plant; rock-no plant; rock-  
189 plant) to investigate which aggregates were increased in the rock-no plant treatment that  
190 resulted in the elevated AggOM contents. To determine soil aggregates, 7 sieves (sizes: 1000,  
191 500, 400, 300, 200 and 70  $\mu\text{m}$ ; pluriStrainer, pluriSelect, Leipzig, Germany) were stacked on  
192 50 mL centrifuge tubes. Suction was applied with a syringe to facilitate filtering of 1 g of soil  
193 and 500 mL of water through the sieves. Subsequently, the sieves were dried and weighed.  
194 The amount of soil in the  $<70 \mu\text{m}$  fraction was determined by the difference in mass.

#### 195 **2.4.6 Soil pH measurement**

196 The soil pH was measured by shaking 1.5 g of soil with 30 mL of either deionised water or  
197 0.01 M  $\text{CaCl}_2$  in 50 mL tubes at 150 rpm for 1 hour. Tubes were left to settle for 20 min  
198 before the pH was measured with a ProLab 5000 pH/EC meter (SI Analytics; Germany).

#### 199 **2.5 Plant elemental content**

200 Representative samples of grain, stem and roots (250 mg) were digested in 9 mL  
201 concentrated  $\text{HNO}_3$  and 1 mL  $\text{H}_2\text{O}_2$  in a microwave digester (Milestone ETHOS UP) at  
202 210°C and 1800 W for 35 min. Samples were subsequently diluted to 2%  $\text{HNO}_3$  and analysed  
203 via ICP-OES (as described above).

#### 204 **2.6 Microbial composition via shotgun metagenomics**

205 Full details about the method to determine microbial composition was described previously  
206 (Buss, Sharma, et al., 2021). In short: a commercial DNA extraction kit (DNeasy PowerSoil  
207 Pro Kit, Qiagen, Hilden, Germany) was used for extracting DNA from the dried soil and the  
208 samples were barcoded with the “Native Barcoding kit” (Oxford Nanopore Technology,  
209 Oxford, UK) and run on a Flongle flow cell (Oxford Nanopore Technology, Oxford, UK).  
210 Data were basecalled and demultiplexed with Guppy (version: 5.0.7; Oxford Nanopore

211 Technology, Oxford, UK and all short (<200 bp) and low quality (<q7) sequences were  
212 removed with NanoPack (De Coster et al., 2018).  
213 Sequences were blasted against the NCBI nucleotide database version 5 (Sayers et al., 2021).  
214 The taxonomic ID for the single best blast hit per sequence was extracted. Sequences without  
215 a match and operational taxonomic units (phylum, class or order) that were only detected  
216 once in a sample were excluded. Sequences matching an operational taxonomic unit (phylum,  
217 class or order) observed in less than 8 samples (each treatment had 8 replicates) were also  
218 filtered out.

## 219 **2.7 Statistics**

220 Statistical analyses were conducted in R (2022.12.0) and most visualisations in SigmaPlot  
221 (Systat Software Inc; San Jose CA, USA). Analysis of variance and Tukey post-hoc tests  
222 were conducted in R using the aov and TukeyHSD functions.

223 Microbial data were processed with Analysis of compositions of microbiomes with bias  
224 correction (ANCOM-BC) on phyla, class and order level using the ANCOMBC2 package in  
225 R (H. Lin & Peddada, 2020). The method normalises the data and checks for statistical  
226 differences based on treatment effects. In addition, the row microbial count data (on phylum,  
227 class and order level) were used for clustering using Non-Metric Multi-Dimensional Scaling  
228 (NMDS) (vegan package; metaMDS; Bray-Curtis dissimilarity matrix) and NMDS 1 and 2  
229 were subsequently plotted. PERMANOVA (vegan package in R) was used to check for  
230 significant differences as a result of rock, plant and water treatments.

## 231 **3 Results**

### 232 **3.1 Rock weathering, soil minerals and plant uptake**

233 The inorganic carbon was not different between the control and rock amended treatments  
234 (Figure 1A). However, rock dust addition increased soil pH and EC immediately after  
235 application to soil (blue - rock dust baseline in Figure 1B and C) and the rock effect persisted  
236 throughout the incubation (significant rock effect on pH and EC). EC decreased from the  
237 baseline values in both the soil only and rock amended treatments. Plants and a high-water  
238 treatment accelerated EC decrease (Figure 1C).

239 Water-extractable Ca and Mg contents in soil increased significantly after rock addition as  
240 expected for weathering, but the plant effect eliminated this and decreased water-extractable  
241 Ca and Mg down to values comparable to the no-rock control treatments (Figure 1D, E).  
242 Rock addition also increased the ammonium acetate-extractable (exchangeable) Ca and Mg  
243 contents, and the levels were significantly higher after the incubation for both planted and  
244 unplanted treatments (Figure 1G and H). There was an initial peak of Ca and Mg release of  
245 fresh rock-sand samples, but we could not detect associated changes with any bi-(carbonate)  
246 levels in water-extractions (data not shown), predicted as part of alkalinity release during  
247 rock weathering. In contrast to the water-extractable contents of Ca and Mg that decreased  
248 over the course of the incubation compared to the baseline value (blue line in Figure 1D, E),  
249 the ammonium acetate-exchangeable content increased (Figure 1G, H). The increase in soil  
250 exchangeable Ca is highly significant in all rock treatments (p-values < 0.0001). For Mg only  
251 the two unplanted treatments were significantly higher than the rock-sand baseline (low  
252 water:  $p = 0.00003$ ; high water:  $p = 0.00029$ ). The water-extractable Si content did not  
253 change as a result of rock addition (Figure 1F), but the exchangeable content increased by 3-  
254 4-fold (Figure 1I).

255 There was no overall effect of rock addition on plant biomass or the individual plant parts (SI  
256 Figure 3) and no effect on uptake (total mass) of Ca and Mg into plant tissue (SI Figure 4).  
257 But the plant grain Ca content (mg Ca per kg plant biomass) and total Ca uptake into grain  
258 (mg Ca per plant) significantly increased because of rock addition ( $p = 3.9 \cdot 10^{-6}$ ; SI Figure 4  
259 and SI Figure 5). Plant tissue contents (stem and root) and total uptake of Si in plant tissue  
260 increased significantly due to rock application (SI Figure 4 and SI Figure 5).

261 Rock amendment significantly decreased soil exchangeable contents, plant tissue levels and  
262 plant uptake of micronutrients Mn and Zn (Figure 2). The rock treatment did not significantly  
263 reduce exchangeable Fe levels (Figure 2A3), yet within the rock treatments, plant addition  
264 decreased exchangeable Fe (Figure 2A3) and Zn (Figure 2A2). Rock significantly decreased  
265 the content and total uptake of Fe into grains (Figure 2C3).

### 266 **3.2 Soil carbon content and three-pool soil carbon fractionation**

267 The total soil carbon content decreased over the course of the incubation in all treatments  
268 (red/blue lines in Figure 3A). The rock-amended soils started with a slightly lower soil  
269 carbon content (blue line) than the control (red line) because the mass of rock addition diluted  
270 the soil carbon content (rock 0.075% C; soil 0.88% C).

271 By the end of the experiment, rock addition led to a 16% higher total carbon content across  
272 all treatments (rock effect:  $p = 0.00007$ ; Figure 3A) and an even 32% higher content when  
273 only the non-planted treatments are considered. Plants partially counteracted the rock effect  
274 decreasing soil carbon content (rock:plant effect:  $p = 0.00006$ ). Overall, the three treatments  
275 and their interactions explained 56% of the variance in soil carbon content of which 35% was  
276 explained by rock, 5% by water, 9% by plants and 19% by rock:plant interactions.

277 We next conducted a three-pool soil fractions to separate labile (free) POM, mineral and  
278 aggregate components (SI Figure 2). The carbon content associated with the free POM

279 fraction decreased drastically over the course of the trial in all treatments from ~0.3% in the  
280 baseline (red/blue line) to ~0.1% (Figure 3B). None of the treatments affected the free POM  
281 loss. Rock addition significantly increased C associated with AggOM by 25% over the non-  
282 amended control and by a massive 46% when only the non-planted treatments are considered  
283 (Figure 3C). Plants counteracted the effect of rock-amendment on AggOM (rock:plant effect;  
284  $p = 0.0002$ ). The carbon content associated with the MAOM fraction increased by 22%  
285 because of rock addition and by 32% when only the non-planted treatments are considered  
286 (Figure 3D). Rock-amendment significantly increased the amount of soil recovered as  
287 MAOM (SI Figure 6A) but decreased the concentration of carbon within the MAOM fraction  
288 by 14% ( $p = 0.0002$ ; SI Figure 6B).

289 High water treatment resulted in significantly lower soil carbon levels than low water  
290 treatment ( $p = 0.00148$ ; Figure 3A). Water treatment only affected the carbon content  
291 associated with MAOM fraction (Figure 3D;  $p = 0.002$ ). This loss of carbon was not  
292 associated with a lower carbon content within the MAOM fraction (SI Figure 6B), but instead  
293 with less soil recovered in this fraction (SI Figure 6A; water effect:  $p = 0.0006$ ).

### 294 **3.3 Two-pool soil carbon fractionation and soil aggregates on a** 295 **subset of samples**

296 Using a two-pool soil carbon fractionation technique that ensures full disaggregation (and  
297 hence separation of the AggOM pool into MAOM and free plus occluded POM) on a sub-set  
298 of samples (Figure 4A; schematic SI Figure 2), both planted and unplanted rock treatments  
299 significantly increased the carbon content associated with the MAOM fraction by ~0.07%  
300 compared to the no-rock treatment. Rock addition also increased the POM fraction that  
301 includes both occluded and free POM (Figure 4A1;  $p = 0.006$ ), but only the unplanted, rock-  
302 amended treatment was different to the control ( $p = 0.005$ ; Figure 4A1). The aqueous fraction

303 that is used to extract the soil, contained dissolved organic matter (DOM) in the range of  
304 0.12-0.15% carbon per unit of soil (SI Figure 7). There was a statistically significant increase  
305 in the DOM pool in the rock, non-planted treatment compared to the control treatment  
306 (ANOVA:  $p = 0.049$ ; Tukey:  $p = 0.046$ ).

307 In the same subset of samples, we analysed soil aggregation within aggregate size classes of  
308  $<70 \mu\text{m}$  to  $>1000 \mu\text{m}$  (Figure 4B). There was a statistically significant increase in  
309 microaggregates of size 70-200  $\mu\text{m}$  from 14.1% in the control to 22.2% in the unplanted,  
310 rock-amended (Tukey post-hoc test:  $p = 0.004$ ). Plants reduced the percentage of  
311 microaggregates to 14.2%, fully counteracting the increase in microaggregation induced by  
312 rock addition (Figure 4B).

### 313 **3.4 Soil DNA and microbial composition**

314 The extractable soil DNA content was significantly higher in rock-amended treatments  
315 compared to unamended treatments (SI Figure 8A). The DNA content decreased over the  
316 course of the trial compared to the baseline indicating that soil DNA was lost. There was a  
317 significant correlation between soil DNA and soil carbon content (SI Figure 8B).

318 The total number of continuous DNA fragments (reads) extracted and sequenced per sample  
319 were between 4,000 to 50,000 with an average read length of 600-3,000 base pairs (SI Table  
320 3), generating  $>1\text{Gb}$  of sequence. The abundant microbial high level taxonomic groups  
321 detected via shotgun metagenomics and long-read sequencing did not change significantly as  
322 a result of rock addition as shown via clustering (SI Figure 9B) and percentage composition  
323 (SI Figure 10). We also did not detect specific changes due to basalt or plant effects on  
324 individual microbial taxa (SI Table 4). Water treatment, however, significantly affected  
325 clustering of the samples based on phylum, class and order level (phylum level clustering in

326 SI Figure 9A (PERMANOVA results in SI Table 5). There were also significant effects  
327 within the microbial taxa due to water treatment at the class and order level (SI Table 4).

### 328 **3.5 Associations of soil properties with SOM fractions and SOM** 329 **transformations**

330 There was a highly significant correlation between soil exchangeable Ca and Mg contents  
331 and soil carbon content ( $p = 2.4 \times 10^{-7}$  and  $p = 2.4 \times 10^{-10}$ ; Figure 5A,D) and a significant  
332 correlation with Fe content ( $p = 0.029$ ; Figure 5G). Exchangeable Ca and Mg contents also  
333 correlated highly significantly with both carbon in AggOM (Figure 5B and E) and MAOM  
334 (Figure 5C and F). Exchangeable Fe only correlated highly significantly with carbon as  
335 AggOM ( $p = 0.005$ ; Figure 5H).

336 The schematic in Figure 6A shows the effects of rock and rock-plant interactions on soil  
337 carbon of different stability compared to the soil-only baseline and is based on Figure 3B-D.  
338 Low- and high-water treatments were pooled to focus on plant and rock effects. C associated  
339 with POM was reduced in all treatments compared to the baseline. However, depending on  
340 treatment, the carbon was either lost or converted into different soil carbon fractions (Figure  
341 6A). In the no-rock treatments, free POM was lost without any conversion into AggOM or  
342 MAOM (C content as AggOM and MAOM same as in the baseline). In the rock amended  
343 treatment, some free POM was instead retained as MAOM and as AggOM. In the non-  
344 planted, rock amended treatment 12% of POM was lost and 19% in the treatment with plant.  
345 Hence, the rock-amended, non-planted control retained 23% of free POM lost in the control  
346 sample in the form of more stable soil carbon fractions.



## 347 **4 Discussion**

### 348 **4.1 Inorganic carbon sequestration**

349 Previous rock weathering studies have found it is challenging to directly detect changes to  
350 soil inorganic carbon content and therefore, typically proxies are used to assess rock  
351 weathering and associated drawdown of atmospheric CO<sub>2</sub>. Such proxies include Ca and Mg  
352 mass balance approaches based on both pore water or ammonium acetate extractable cations  
353 and changes in pH and EC compared to a non-amended control (Amann et al., 2020; Amann  
354 & Hartmann, 2022; Kelland et al., 2020; ten Berge et al., 2012). In this study, we found  
355 elevated levels of water-extractable and exchangeable Ca and Mg contents and pH and EC  
356 levels in soil 6 months after rock addition. However, water-extractable Ca and Mg did not  
357 indicate additional weathering of our mining residues since the levels peaked at the start of  
358 the incubation (fresh rock-soil mix) and this peak was not associated with any (bi)carbonate  
359 formation (product of Ca- and Mg-rich silicate reaction with carbonic acid). Our mining  
360 residues had pre-weathered and contained 19.1% amorphous material and 3.9% secondary  
361 minerals, which likely contained cations that were only sorbed to mineral surfaces and were  
362 released without reacting with carbonic acid. These readily available cations would be  
363 responsible for this initial Ca and Mg release. Pre-weathering eliminates the Ca and Mg mass  
364 balance approach as proxy for new carbon drawdown and may be unsuitable for mining  
365 residues, at least if water extraction or pore water values are used.

366 There is some evidence for rock weathering based on exchangeable Ca and Mg contents,  
367 which were higher at the end of the trial compared to the rock-soil baseline. However, there is  
368 also no (extra) inorganic carbon detected in soil at the end of the incubation, as previously  
369 reported (Kelland et al., 2020). Overall, we could not find evidence for inorganic carbon  
370 formation in our trial. Only around half of the rock was composed of basalt and the

371 percentage of the fast-weathering mineral olivine was only 2%, which expectantly did not  
372 result in a strong weathering signal at an application rate of 50 t ha<sup>-1</sup>. Given the large range of  
373 weathering rates and associated carbon drawdown rates in the literature, it is clear that the  
374 method for determining weathering rates needs refinement. Other indirect weathering effects,  
375 as presented here for SOM, do show potential.

## 376 **4.2 Rock addition increases organic carbon protection**

377 POM in sandy soil has little protection from decomposition and subsequently 2/3 of the POM  
378 in the baseline soil was lost after 6 months of incubation under growing conditions (Figure  
379 6A). Rock dust addition decreased SOM losses by transformation of POM into more durable  
380 soil carbon fractions, and the effects were linked to changes in soil chemistry. We failed to  
381 detect substantial abundance or composition shifts in the microbiome as a result of rock  
382 addition (SI Figure 9). Our microbiome assay using shotgun, long-read sequences via Oxford  
383 Nanopore Technology is robust and can detect differences among treatments in  
384 environmental samples (Hamner et al., 2019; Loit et al., 2019; Petersen et al., 2020). Our  
385 study shows that water treatment did have an effect on microbial composition as expected.  
386 The soil response to rock addition can, however, be explained by three main chemical  
387 changes that fostered SOM protection.

388 First, our rock mining residues were clearly pre-weathered (Table 1), therefore, the rocks  
389 provided secondary silicate minerals immediately after application that were able to sorb  
390 DOM directly. The concentration of carbon within MAOM of these rock-amended soils were  
391 lower than their no-rock counterparts, which indicates potential for further carbon sorption  
392 and hence MAOM formation with continuing rock weathering.

393 Secondly, rock provided Ca and Mg that are key cations involved in polyvalent cation  
394 bridging and associated MAOM formation, along with Fe and Al. Ca and Mg mostly operate

395 in soil at neutral pH and Fe and Al in acidic conditions (Rowley et al., 2018; Singh et al.,  
396 2018). Our baseline soil pH was slightly acidic with a pH of 5.7 in water and 4.9 in 0.01 M  
397 CaCl<sub>2</sub>, which increased to 6.2 in water (data not shown) and 5.2 in 0.01 M CaCl<sub>2</sub> at the end of  
398 the incubation across all treatment. At this pH range both groups of cations are similarly  
399 important in cation bridging, yet given our correlation analysis (Figure 5), exchangeable Ca  
400 and Mg seemed to play a more important role in MAOM formation in our case.

401 Third, the results from both fractionation assays showed that rock clearly increased SOM  
402 occluded within microaggregates. This increase in microaggregates and associated AggOM  
403 can be explained by the supply of available Ca and Mg by the rock (Figure 6B), which  
404 facilitated the formation of soil aggregates and carbon protection (Baldock, 1989; Clough &  
405 Skjemstad, 2000; Rowley et al., 2018; Totsche et al., 2018). Our strong correlation between  
406 soil exchangeable Ca and SOM content (Figure 5A) has also been seen in a previous study  
407 (Rowley et al., 2018). In our trial, rock addition protected an extra 17% (Figure 6) (or  
408 ~0.15% C in absolute values (Figure 3)) of soil carbon within AggOM that was lost without  
409 rock addition. This effect could play a significant role in protection of POM from  
410 decomposition, in particular in soil with low degree of aggregation and soil exchangeable Ca  
411 and Mg levels.

412 Overall, the soil carbon content was 32% higher after rock amendment or 0.2% per weight of  
413 soil. At a soil bulk density of 1.2 g cm<sup>-3</sup> and a soil depth of 0.2 m this corresponds to 4.8 t of  
414 extra stable carbon stored per hectare. While these results so far are only valid for sandy soils  
415 of similar chemistry and cannot be extrapolated to larger areas globally, it does clearly  
416 demonstrate the potential of ground rock application for sequestering additional organic  
417 carbon. Plants, however, partially counteracted this effect.

### 418 **4.3 Plant counteraction of protection of carbon in aggregates due** 419 **to micronutrient deficiency**

420 In the absence of rock, plants increased the soil carbon content (Figure 3). However, under  
421 the altered chemical conditions after rock-amendment, plants reduced the protection of SOM  
422 in aggregates (Figure 6B). It was shown previously that plant root exudates can accelerate the  
423 turnover of aggregates, i.e., induce aggregate formation but also destruction (He et al., 2020;  
424 Ma et al., 2022; Wang et al., 2020). Plants altered the chemical changes induced by rock  
425 addition on SOM content and exchangeable cation levels.

426 Plants, including wheat, can increase root exudation as a response to nutrient deficiency to  
427 solubilise micronutrients, such as Mn, Zn or Fe, to increase their availability and uptake  
428 (Awad et al., 1994; Cakmak & Marschner, 1988; Gherardi & Rengel, 2004; F. Li et al.,  
429 2018). Zn deficiency in various plant species, for example, increased root exudation by a  
430 factor of 2 on average (Cakmak & Marschner, 1988). Such exudates include oxalate,  
431 tartarate, L-malate, lactate, citrate and succinate (Gherardi & Rengel, 2004). The dramatic  
432 drop in exchangeable micronutrient levels in our study after rock addition, as also observed  
433 for Mn in a previous study after basalt application (Anda et al., 2015), and subsequent lower  
434 plant uptake suggests exudation to solubilise micronutrients and increase plant uptake (Figure  
435 6B). Availability of Mn and Zn decreases exponentially in the pH range of our soils (5-6.5)  
436 through an increase of adsorbed Mn and Zn to soil surfaces (Basta et al., 2005). Rock  
437 addition increased the pH by ~0.2 units within this pH range explaining the drop in  
438 micronutrient availability.

439 Root exudates, such as oxalic acid/oxalate, increase micronutrient availability and hence  
440 plant uptake. However, they can also strip polyvalent cations from their metalorganic ligand  
441 complexes that results in both loss of cations and carbon (Keiluweit et al., 2015; F. Li et al.,

442 2018; H. Li et al., 2021). Fe does play a particularly important role in the formation of  
443 microaggregates (52-250  $\mu\text{m}$ ) (Z. Lin et al., 2022; Xue et al., 2019) and hence loss of Fe in  
444 addition to Ca and Mg can explain the loss in microaggregates and carbon in AggOM in our  
445 study. With a loss of Ca, Mg and Fe as mediators between clay surfaces and soil organic  
446 carbon and cementation agents, soil aggregation decreased and hence less soil organic carbon  
447 was stabilised. This shows the complexity of the system and how soil chemistry changes can  
448 alter the effect of plants on SOM content, which in this case resulted in loss of soil carbon  
449 with rock addition. Addressing micronutrient deficiencies should avoid the effect plants had  
450 on soil aggregation and associated carbon contained within aggregates. Future studies should  
451 be designed to specifically investigate this hypothesis.

## 452 **Conclusion**

453 We found evidence that a blend of granite and basalt applied to a sandy soil weathered during  
454 a 6-month incubation, as demonstrated by soil exchangeable Ca and Mg that were elevated  
455 compared to the baseline values. However, this was not associated with the expected increase  
456 in soil inorganic carbon content. Instead, rock addition increased SOM stabilisation through  
457 the release of Ca and Mg and provision of secondary minerals. A growing wheat plant  
458 partially counteracted this affect likely due to the release of plant root exudates induced by  
459 reductions in micronutrient levels, Mn and Zn, after rock addition and its associated pH  
460 increase. Such exudates solubilised, and hence induced losses of Ca, Mg and Fe that are  
461 typically involved in aggregate stabilisation, which also induced losses of carbon formerly  
462 protected in aggregates. Still, the application of Ca- and Mg-rich silicates can be a valuable  
463 tool to stabilise SOM, particularly in sandy soil and when micronutrient deficiencies are  
464 addressed. This could substantially improve the carbon sequestration potential of ground rock  
465 application on agricultural land. Higher soil organic carbon levels can have further soil and  
466 plant benefits, such as increasing nutrient and water retention. These findings could boost the  
467 economic and environmental attractiveness of enhanced rock weathering as a global method  
468 for carbon dioxide removal.

## 469 **Acknowledgement**

470 The funding for this project was provided by an ANU Grand Challenge. We thank Munash  
471 Organics for the provision of the rock for the trials, the Australian Plant Phenomics Facility,  
472 which is supported under the National Collaborative Research Infrastructure Strategy of the  
473 Australian Government, and Environmental Analysis Laboratory. We acknowledge  
474 assistance from Dr. Michael Wellington, Dr. Ulrike Troitzsch, Dr. James Latimer, Dr. Brett

475 Knowles, Robin Grun, Andi Wibowo, Sophia Cain, Imelda Forteza and Alek Meade for lab  
476 and technical support.

## 477 **References**

- 478 Abramoff, R., Xu, X., Hartman, M., O'Brien, S., Feng, W., Davidson, E., Finzi, A.,  
479 Moorhead, D., Schimel, J., Torn, M., & Mayes, M. A. (2018). The Millennial model: in  
480 search of measurable pools and transformations for modeling soil carbon in the new  
481 century. *Biogeochemistry*, *137*(1–2), 51–71. <https://doi.org/10.1007/s10533-017-0409-7>
- 482 Alvarez, R. (2005). A review of nitrogen fertilizer and conservation tillage effects on soil  
483 organic carbon storage. *Soil Use and Management*, *21*(1), 38–52.  
484 <https://doi.org/10.1079/sum2005291>
- 485 Amann, T., & Hartmann, J. (2022). Carbon Accounting for Enhanced Weathering. *Frontiers*  
486 *in Climate*, *4*. <https://doi.org/10.3389/fclim.2022.849948>
- 487 Amann, T., Hartmann, J., Struyf, E., De Oliveira Garcia, W., Fischer, E. K., Janssens, I.,  
488 Meire, P., & Schoelynck, J. (2020). Enhanced Weathering and related element fluxes -  
489 A cropland mesocosm approach. *Biogeosciences*, *17*(1), 103–119.  
490 <https://doi.org/10.5194/bg-17-103-2020>
- 491 Amezketta, E. (1999). Soil aggregate stability: A review. *Journal of Sustainable Agriculture*,  
492 *14*, 83–151. <https://doi.org/10.1300/J064v14n02>
- 493 Anda, M., Shamshuddin, J., & Fauziah, C. I. (2015). Improving chemical properties of a  
494 highly weathered soil using finely ground basalt rocks. *Catena*, *124*, 147–161.  
495 <https://doi.org/10.1016/j.catena.2014.09.012>
- 496 Awad, E., Romheld, V., & Marschner, H. (1994). Effect of root exudates on mobilization in  
497 the rhizosphere and uptake of iron by wheat plants. In *Plant and Soil* (Vol. 165). Kluwer  
498 Academic Publishers.



- 499 Baldock, J. (1989). *Influence of calcium on the decomposition of organic materials in soils*  
500 [PhD Thesis]. The University of Adelaide.
- 501 Basta, N. T., Ryan, J. a., & Chaney, R. L. (2005). Trace element chemistry in residual-treated  
502 soil: key concepts and metal bioavailability. *Journal of Environmental Quality*, 34(1),  
503 49–63. <http://www.ncbi.nlm.nih.gov/pubmed/15647534>
- 504 Beerling, D. J., Leake, J. R., Long, S. P., Scholes, J. D., Ton, J., Nelson, P. N., Bird, M.,  
505 Kantzas, E., Taylor, L. L., Sarkar, B., Kelland, M., Delucia, E., Kantola, I., Müller, C.,  
506 Rau, G. H., & Hansen, J. (2018). Climate, Food and Soil Security. *Nature Plants*,  
507 4(March), 138–147. <https://doi.org/10.1038/s41477-018-0108-y>
- 508 Bormann, B. T., Wang, D., Bormann, F. H., Benoit, G., April, R., & Snyder, M. C. (1998).  
509 Rapid, plant-induced weathering in an aggrading experimental ecosystem.  
510 *Biogeochemistry*, 43(2), 129–155. <https://doi.org/10.1023/A:1006065620344>
- 511 Brady, P. V., Dorn, R. I., Brazel, A. J., Clark, J., Moore, R. B., & Glidewell, T. (1999). Direct  
512 measurement of the combined effects of lichen, rainfall, and temperature on silicate  
513 weathering. *Geochimica et Cosmochimica Acta*, 63(19–20), 3293–3300.  
514 [https://doi.org/10.1016/S0016-7037\(99\)00251-3](https://doi.org/10.1016/S0016-7037(99)00251-3)
- 515 Buss, W., Sharma, R., Ferguson, S., & Borevitz, J. (2021). Soil organic carbon fractionation  
516 and metagenomics pipeline to link carbon content and stability with microbial  
517 composition – First results investigating fungal endophytes. *BioRxiv*, PREPRINT.
- 518 Buss, W., Yeates, K., Rohling, E. J., & Borevitz, J. (2021). Enhancing natural cycles in agro-  
519 ecosystems to boost plant carbon capture and soil storage. *Oxford Open Climate*  
520 *Change*, 1(1), kgab006. <https://doi.org//10.1093/oxfclm/kgab006>

- 521 Cakmak, I., & Marschner, H. (1988). Increase in Membrane Permeability and Exudation in  
522 Roots of Zinc Deficient Plants. *Journal of Plant Physiology*, *132*(3), 356–361.  
523 [https://doi.org/10.1016/S0176-1617\(88\)80120-2](https://doi.org/10.1016/S0176-1617(88)80120-2)
- 524 Clough, A., & Skjemstad, J. O. (2000). Physical and chemical protection of soil organic  
525 carbon in three agricultural soils with different contents of calcium carbonate. *Australian*  
526 *Journal of Soil Research*, *38*(5), 1005–1016. <https://doi.org/10.1071/SR99102>
- 527 Cochran, M. F., & Berner, R. A. (1996). Promotion of chemical weathering by higher plants:  
528 field observations on Hawaiian basalts. *Chemical Geology*, *132*, 71–77.
- 529 Cotrufo, M. F., Ranalli, M. G., Haddix, M. L., Six, J., & Lugato, E. (2019). Soil carbon  
530 storage informed by particulate and mineral-associated organic matter. *Nature*  
531 *Geoscience*, *12*(12), 989–994. <https://doi.org/10.1038/s41561-019-0484-6>
- 532 De Coster, W., Hert, S. D., Schultz, D. T., Cruts, M., & Broeckhoven, C. Van. (2018).  
533 NanoPack: visualizing and processing long-read sequencing data. *Bioinformatics*,  
534 *34*(March), 2666–2669. <https://doi.org/10.1093/bioinformatics/bty149>
- 535 Fuss, S., Lamb, W. F., Callaghan, M. W., Hilaire, J., Creutzig, F., Amann, T., Beringer, T.,  
536 De Oliveira Garcia, W., Hartmann, J., Khanna, T., Luderer, G., Nemet, G. F., Rogelj, J.,  
537 Smith, P., Vicente, J. V., Wilcox, J., Del Mar Zamora Dominguez, M., & Minx, J. C.  
538 (2018). Negative emissions - Part 2: Costs, potentials and side effects. *Environmental*  
539 *Research Letters*, *13*(6). <https://doi.org/10.1088/1748-9326/aabf9f>
- 540 Gherardi, M. J., & Rengel, Z. (2004). The effect of manganese supply on exudation of  
541 carboxylates by roots of lucerne (*Medicago sativa*). In *Plant and Soil* (Vol. 260).
- 542 Hamner, S., Brown, B. L., Hasan, N. A., Franklin, M. J., Doyle, J., Eggers, M. J., Colwell, R.  
543 R., & Ford, T. E. (2019). Metagenomic profiling of microbial pathogens in the little

- 544 bighorn river, Montana. *International Journal of Environmental Research and Public*  
545 *Health*, 16(7). <https://doi.org/10.3390/ijerph16071097>
- 546 Haque, F., Santos, R. M., & Chiang, Y. W. (2020). Optimizing Inorganic Carbon  
547 Sequestration and Crop Yield With Wollastonite Soil Amendment in a Microplot Study.  
548 *Frontiers in Plant Science*, 11(July), 1–12. <https://doi.org/10.3389/fpls.2020.01012>
- 549 Haque, F., Santos, R. M., Dutta, A., Thimmanagari, M., & Chiang, Y. W. (2019). Co-  
550 Benefits of Wollastonite Weathering in Agriculture: CO<sub>2</sub> Sequestration and Promoted  
551 Plant Growth [Research-article]. *ACS Omega*, 4(1), 1425–1433.  
552 <https://doi.org/10.1021/acsomega.8b02477>
- 553 Hartmann, J., West, A. J., Renforth, P., Köhler, P., De La Rocha, C. L., Wolf-Gladrow, D.  
554 A., Dürr, H. H., & Scheffran, J. (2013). Enhanced chemical weathering as a  
555 geoengineering strategy to reduce atmospheric carbon dioxide, supply nutrients, and  
556 mitigate ocean acidification. *Reviews of Geophysics*, 51(2), 113–149.  
557 <https://doi.org/10.1002/rog.20004>
- 558 He, Y., Cheng, W., Zhou, L., Shao, J., Liu, H., Zhou, H., Zhu, K., & Zhou, X. (2020). Soil  
559 DOC release and aggregate disruption mediate rhizosphere priming effect on soil C  
560 decomposition. *Soil Biology and Biochemistry*, 144.  
561 <https://doi.org/10.1016/j.soilbio.2020.107787>
- 562 Hemingway, J. D., Rothman, D. H., Grant, K. E., Rosengard, S. Z., Eglinton, T. I., Derry, L.  
563 A., & Galy, V. v. (2019). Mineral protection regulates long-term global preservation of  
564 natural organic carbon. *Nature*, 570(7760), 228–231. [https://doi.org/10.1038/s41586-](https://doi.org/10.1038/s41586-019-1280-6)  
565 [019-1280-6](https://doi.org/10.1038/s41586-019-1280-6)

- 566 Hinsinger, P., Fernandes Barros, O. N., Benedetti, M. F., Noack, Y., & Callot, G. (2001).  
567 Plant-induced weathering of a basaltic rock: Experimental evidence. *Geochimica et*  
568 *Cosmochimica Acta*, 65(1), 137–152. [https://doi.org/10.1016/S0016-7037\(00\)00524-X](https://doi.org/10.1016/S0016-7037(00)00524-X)
- 569 Holdren, G. R., & Speyer, P. M. (1985). Reaction rate-surface area relationships during the  
570 early stages of weathering. I. Initial observations. *Geochimica et Cosmochimica Acta*,  
571 51(9), 2311–2318. [https://doi.org/10.1016/0016-7037\(87\)90284-5](https://doi.org/10.1016/0016-7037(87)90284-5)
- 572 IPCC. (2022). *Climate Change 2022: Mitigation of Climate Change. Contribution of*  
573 *Working Group III to the Sixth Assessment Report of the Intergovernmental Panel on*  
574 *Climate Change* (P. Shukla, J. Skea, P. Shukla, A. Al Khouradajie, R. van Diemen, D.  
575 McCollum, M. Pathak, S. Some, P. Vyas, R. Fradera, M. Belcaceci, A. Hasuja, G.  
576 Lisboa, S. Luz, & J. Malley, Eds.). Cambridge University Press.  
577 <https://doi.org/10.1017/9781009157926>
- 578 Keiluweit, M., Bougoure, J. J., Nico, P. S., Pett-ridge, J., Weber, P. K., & Kleber, M. (2015).  
579 Mineral protection of soil carbon counteracted by root exudates. *Nature Climate*  
580 *Change*, 5(June), 588–595. <https://doi.org/10.1038/NCLIMATE2580>
- 581 Kelland, M. E., Wade, P. W., Lewis, A. L., Taylor, L. L., Sarkar, B., Andrews, M. G.,  
582 Lomas, M. R., Cotton, T. E. A., Kemp, S. J., James, R. H., Pearce, C. R., Hartley, S. E.,  
583 Hodson, M. E., Leake, J. R., Banwart, S. A., & Beerling, D. J. (2020). Increased yield  
584 and CO<sub>2</sub> sequestration potential with the C<sub>4</sub> cereal *Sorghum bicolor* cultivated in  
585 basaltic rock dust-amended agricultural soil. *Global Change Biology, March*, 1–19.  
586 <https://doi.org/10.1111/gcb.15089>
- 587 Kleber, M., Eusterhues, K., Keiluweit, M., Mikutta, C., Mikutta, R., & Nico, P. S. (2015).  
588 Mineral-Organic Associations: Formation, Properties, and Relevance in Soil

- 589 Environments. *Advances in Agronomy*, 130, 1–140.
- 590 <https://doi.org/10.1016/bs.agron.2014.10.005>
- 591 Kuzyakov, Y. (2010). Priming effects: Interactions between living and dead organic matter.
- 592 *Soil Biology and Biochemistry*, 42(9), 1363–1371.
- 593 <https://doi.org/10.1016/j.soilbio.2010.04.003>
- 594 Lavallee, J. M., Soong, J. L., & Cotrufo, M. F. (2020). Conceptualizing soil organic matter
- 595 into particulate and mineral-associated forms to address global change in the 21st
- 596 century. *Global Change Biology*, 26(1), 261–273. <https://doi.org/10.1111/gcb.14859>
- 597 Li, F., Koopal, L., & Tan, W. (2018). Roles of different types of oxalate surface complexes in
- 598 dissolution process of ferrihydrite aggregates. *Scientific Reports*, 8(1).
- 599 <https://doi.org/10.1038/s41598-018-20401-5>
- 600 Li, G., Hartmann, J., Derry, L. A., West, A. J., You, C., Long, X., Zhan, T., Li, L., Li, G.,
- 601 Qiu, W., Li, T., Liu, L., Chen, Y., Ji, J., Zhao, L., & Chen, J. (2016). Temperature
- 602 dependence of basalt weathering. *Earth and Planetary Science Letters*, 443, 59–69.
- 603 <https://doi.org/10.1016/j.epsl.2016.03.015>
- 604 Li, H., Bolscher, T., Winnick, M., Tfaily, M. M., Cardon, Z. G., & Keiluweit, M. (2021).
- 605 Simple plant and microbial exudates destabilize mineral-Associated organic matter via
- 606 multiple pathways. *Environmental Science and Technology*, 55(5), 3389–3398.
- 607 <https://doi.org/10.1021/acs.est.0c04592>
- 608 Lin, H., & Peddada, S. Das. (2020). Analysis of compositions of microbiomes with bias
- 609 correction. *Nature Communications*, 11(1). <https://doi.org/10.1038/s41467-020-17041-7>
- 610 Lin, Z., Huang, Z. gang, Liao, D. lan, Huang, W. xia, Huang, J., & Deng, Y. song. (2022).
- 611 Effects of soil organic matter components and iron aluminum oxides on aggregate

- 612 stability during vegetation succession in granite red soil eroded areas. *Journal of*  
613 *Mountain Science*, 19(9), 2634–2650. <https://doi.org/10.1007/s11629-021-7185-5>
- 614 Loit, K., Adamson, K., Bahram, M., Puusepp, R., Anslan, S., Kiiker, R., Drenkhan, R., &  
615 Tedersoo, L. (2019). Relative Performance of MinION (Oxford Nanopore Technologies)  
616 versus Sequel (Pacific Biosciences) Third-Generation Sequencing Instruments in  
617 Identification of Agricultural and Forest Fungal Pathogens. *Applied and Environmental*  
618 *Microbiology*, 85(21), 1–20. <https://doi.org/10.1128/AEM>
- 619 Luo, Z., Feng, W., Luo, Y., Baldock, J., & Wang, E. (2017). Soil organic carbon dynamics  
620 jointly controlled by climate, carbon inputs, soil properties and soil carbon fractions.  
621 *Global Change Biology*, 23(10), 4430–4439. <https://doi.org/10.1111/gcb.13767>
- 622 Ma, W., Tang, S., Dengzeng, Z., Zhang, D., Zhang, T., & Ma, X. (2022). Root exudates  
623 contribute to belowground ecosystem hotspots: A review. In *Frontiers in Microbiology*  
624 (Vol. 13). Frontiers Media S.A. <https://doi.org/10.3389/fmicb.2022.937940>
- 625 Petersen, L. M., Martin, I. W., Moschetti, W. E., Kershaw, C. M., & Tsongalis, G. J. (2020).  
626 Third-Generation Sequencing in the Clinical Laboratory: Exploring the Advantages and  
627 Challenges of Nanopore Sequencing. *Journal of Clinical Microbiology*, 58(1), 1–10.  
628 <https://journals.asm.org/journal/jcm>
- 629 Poeplau, C., Don, A., Six, J., Kaiser, M., Benbi, D., Chenu, C., Cotrufo, M. F., Derrien, D.,  
630 Gioacchini, P., Grand, S., Gregorich, E., Griepentrog, M., Gunina, A., Haddix, M.,  
631 Kuzyakov, Y., Kühnel, A., Macdonald, L. M., Soong, J., Trigalet, S., ... Nieder, R.  
632 (2018). Isolating organic carbon fractions with varying turnover rates in temperate  
633 agricultural soils – A comprehensive method comparison. *Soil Biology and*  
634 *Biochemistry*, 125(June 2017), 10–26. <https://doi.org/10.1016/j.soilbio.2018.06.025>

- 635 Poeplau, C., Sigurdsson, P., & Sigurdsson, B. D. (2020). Depletion of soil carbon and  
636 aggregation after strong warming of a subarctic Andosol under forest and grassland  
637 cover. *SOIL*, 6(1), 115–129. <https://doi.org/10.5194/soil-6-115-2020>
- 638 Renforth, P. (2012). The potential of enhanced weathering in the UK. *International Journal*  
639 *of Greenhouse Gas Control*, 10, 229–243. <https://doi.org/10.1016/j.ijggc.2012.06.011>
- 640 Rowley, M. C., Grand, S., & Verrecchia, É. P. (2018). Calcium-mediated stabilisation of soil  
641 organic carbon. *Biogeochemistry*, 137(1–2), 27–49. [https://doi.org/10.1007/s10533-017-](https://doi.org/10.1007/s10533-017-0410-1)  
642 0410-1
- 643 Sayers, E. W., Beck, J., Bolton, E. E., Bourexis, D., Brister, J. R., Canese, K., Comeau, D. C.,  
644 Funk, K., Kim, S., Klimke, W., Marchler-Bauer, A., Landrum, M., Lathrop, S., Lu, Z.,  
645 Madden, T. L., O’Leary, N., Phan, L., Rangwala, S. H., Schneider, V. A., ... Sherry, S.  
646 T. (2021). Database resources of the National Center for Biotechnology Information.  
647 *Nucleic Acids Research*, 49(October 2020), 10–17. <https://doi.org/10.1093/nar/gkaa892>
- 648 Singh, M., Sarkar, B., Sarkar, S., Churchman, J., Bolan, N., Mandal, S., Menon, M.,  
649 Purakayastha, T. J., & Beerling, D. J. (2018). Stabilization of Soil Organic Carbon as  
650 Influenced by Clay Mineralogy. *Advances in Agronomy*, 148, 33–84.  
651 <https://doi.org/10.1016/bs.agron.2017.11.001>
- 652 Taylor, J. C. (1991). Computer Programs for Standardless Quantitative Analysis of Minerals  
653 Using the Full Powder Diffraction Profile. *Powder Diffraction*, 6(1), 2–9.  
654 <https://doi.org/10.1017/S0885715600016778>
- 655 ten Berge, H. F. M., van der Meer, H. G., Steenhuizen, J. W., Goedhart, P. W., Knops, P., &  
656 Verhagen, J. (2012). Olivine weathering in soil, and its effects on growth and nutrient  
657 uptake in ryegrass (*Lolium perenne* L.): A pot experiment. *PLoS ONE*, 7(8).  
658 <https://doi.org/10.1371/journal.pone.0042098>

- 659 Totsche, K. U., Amelung, W., Gerzabek, M. H., Guggenberger, G., Klumpp, E., Knief, C.,  
660 Lehndorff, E., Mikutta, R., Peth, S., Prechtel, A., Ray, N., & Kögel-Knabner, I. (2018).  
661 Microaggregates in soils. In *Journal of Plant Nutrition and Soil Science* (Vol. 181, Issue  
662 1, pp. 104–136). Wiley-VCH Verlag. <https://doi.org/10.1002/jpln.201600451>
- 663 Wang, X., Yin, L., Dijkstra, F. A., Lu, J., Wang, P., & Cheng, W. (2020). Rhizosphere  
664 priming is tightly associated with root-driven aggregate turnover. *Soil Biology and*  
665 *Biochemistry*, *149*. <https://doi.org/10.1016/j.soilbio.2020.107964>
- 666 White, A. F., & Blum, A. E. (1995). Effects of climate on chemical weathering in watersheds.  
667 *Water-Rock Interaction. Proc. Symposium, Vladivostok, 1995*, *59*(9), 57–60.
- 668 Wiesmeier, M., Urbanski, L., Hobley, E., Lang, B., von Lützow, M., Marin-Spiotta, E., van  
669 Wesemael, B., Rabot, E., Ließ, M., Garcia-Franco, N., Wollschläger, U., Vogel, H. J., &  
670 Kögel-Knabner, I. (2019). Soil organic carbon storage as a key function of soils - A  
671 review of drivers and indicators at various scales. *Geoderma*, *333*(July 2018), 149–162.  
672 <https://doi.org/10.1016/j.geoderma.2018.07.026>
- 673 Xue, B., Huang, L., Huang, Y., Yin, Z., Li, X., & Lu, J. (2019). Effects of organic carbon and  
674 iron oxides on soil aggregate stability under different tillage systems in a rice–rape  
675 cropping system. *Catena*, *177*, 1–12. <https://doi.org/10.1016/j.catena.2019.01.035>
- 676



Table 1: Characterisation of rock sample.

|                                     |       |
|-------------------------------------|-------|
| Mineralogy                          | (%)   |
| Amorphous                           | 19.1  |
| Quartz                              | 16.3  |
| Plagioclase                         | 34.4  |
| K-feldspar                          | 5.7   |
| Clinopyroxene                       | 10.4  |
| Olivine                             | 2     |
| Nepheline                           | 1.2   |
| Analcime                            | 1.3   |
| Apatite                             | 1.3   |
| Kaolinite                           | 0.2   |
| Mica                                | 4.4   |
| 2:1 Clay                            | 3.7   |
| * Chlorite, Vermiculite or Smectite |       |
| Elemental content                   | (%)   |
| Al <sub>2</sub> O <sub>3</sub>      | 13.4  |
| BaO                                 | 0.04  |
| CaO                                 | 4.67  |
| Cr <sub>2</sub> O <sub>3</sub>      | 0.05  |
| Fe <sub>2</sub> O <sub>3</sub>      | 8.12  |
| K <sub>2</sub> O                    | 2.65  |
| MgO                                 | 4.13  |
| MnO                                 | 0.10  |
| Na <sub>2</sub> O                   | 3.24  |
| P <sub>2</sub> O <sub>5</sub>       | 0.42  |
| SiO <sub>2</sub>                    | 60.9  |
| SrO                                 | 0.05  |
| TiO <sub>2</sub>                    | 1.41  |
| Particle size                       | (%)   |
| <90                                 | 96.5  |
| <70                                 | 89.3  |
| <50                                 | 80.1  |
| <10                                 | 29.6  |
| Loss on ignition                    | 0.68  |
| pH (in water)                       | 9.2   |
| C content (%)                       | 0.075 |

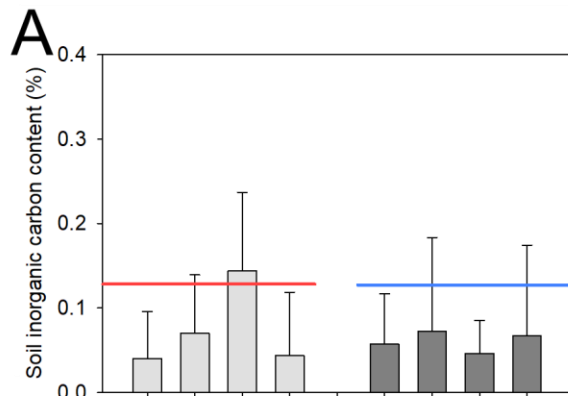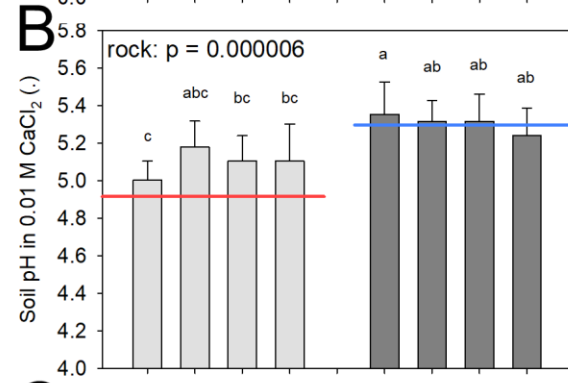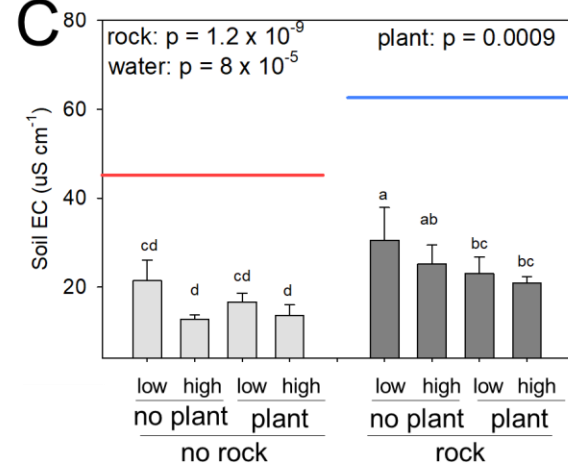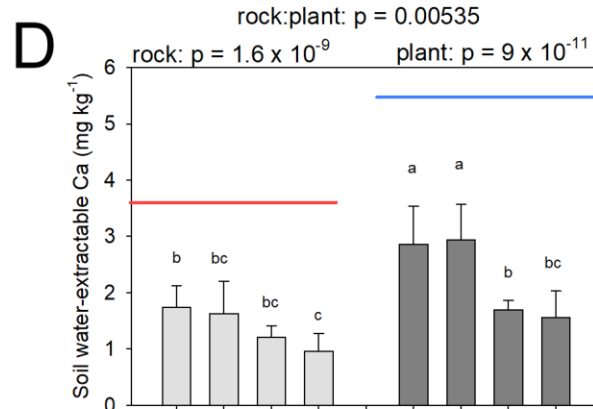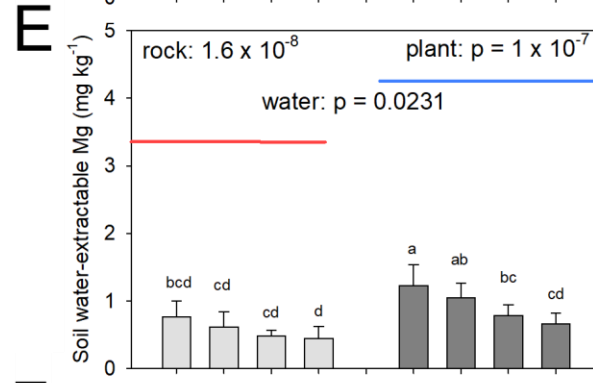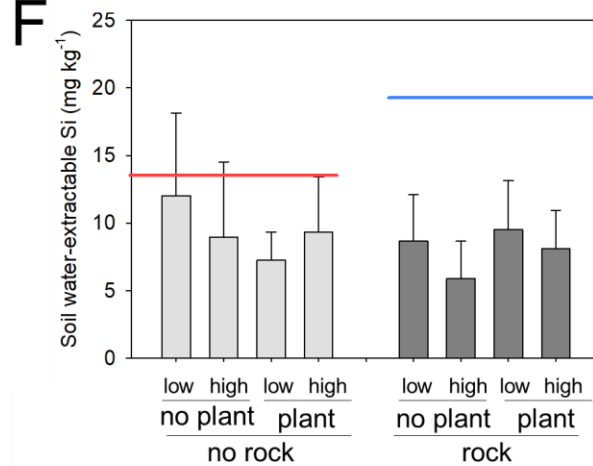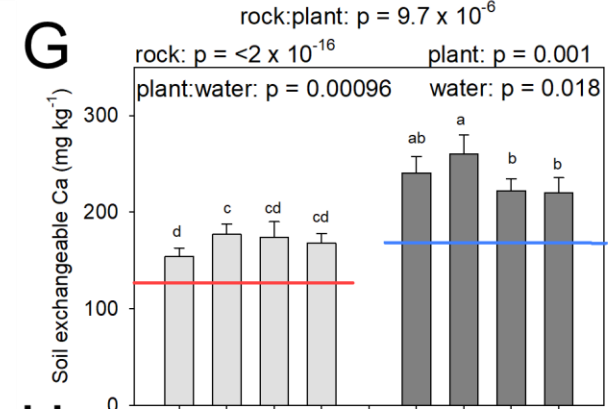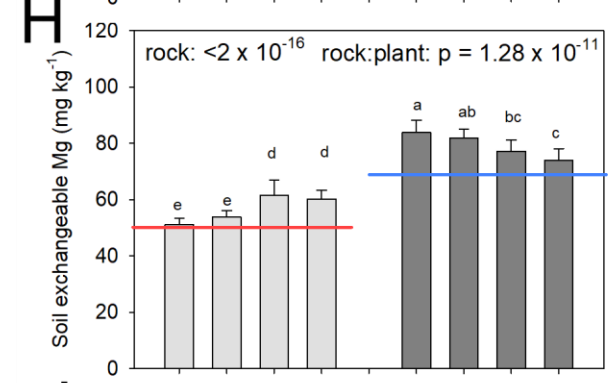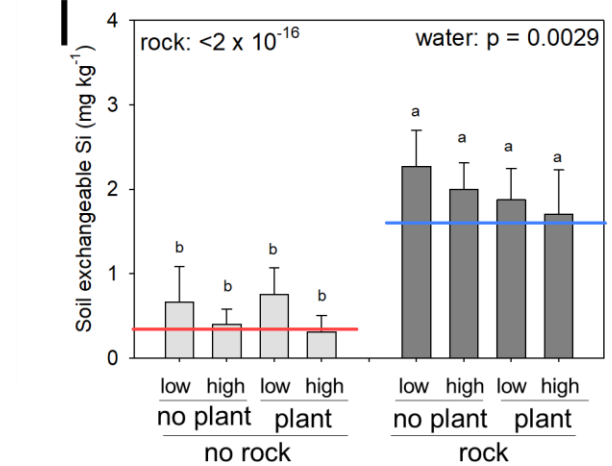

**Figure 1:** Soil indicators for weathering of Ca- and Mg-rich silicate rocks at the end of 6-month incubation. (A) Inorganic carbon content, (B) pH, (C) EC, and (D) water-extractable Ca, (E) Mg and (F) Si contents and ammonium acetate-extractable (exchangeable) (G) Ca, (H) Mg and (I) Si contents. Soil was analysed at the end of a 6-month incubation study using a full factorial design with high/low water, unplanted/planted soil and soil only/rock addition. Red and blue lines indicate baseline values from the soil at the start of the trial without and with rock addition (~4%), respectively. Main effects determined using one-way ANOVAs (results shown at the top of each figure). Different letters indicate significant differences among the treatments determined via Tukey post-hoc test.

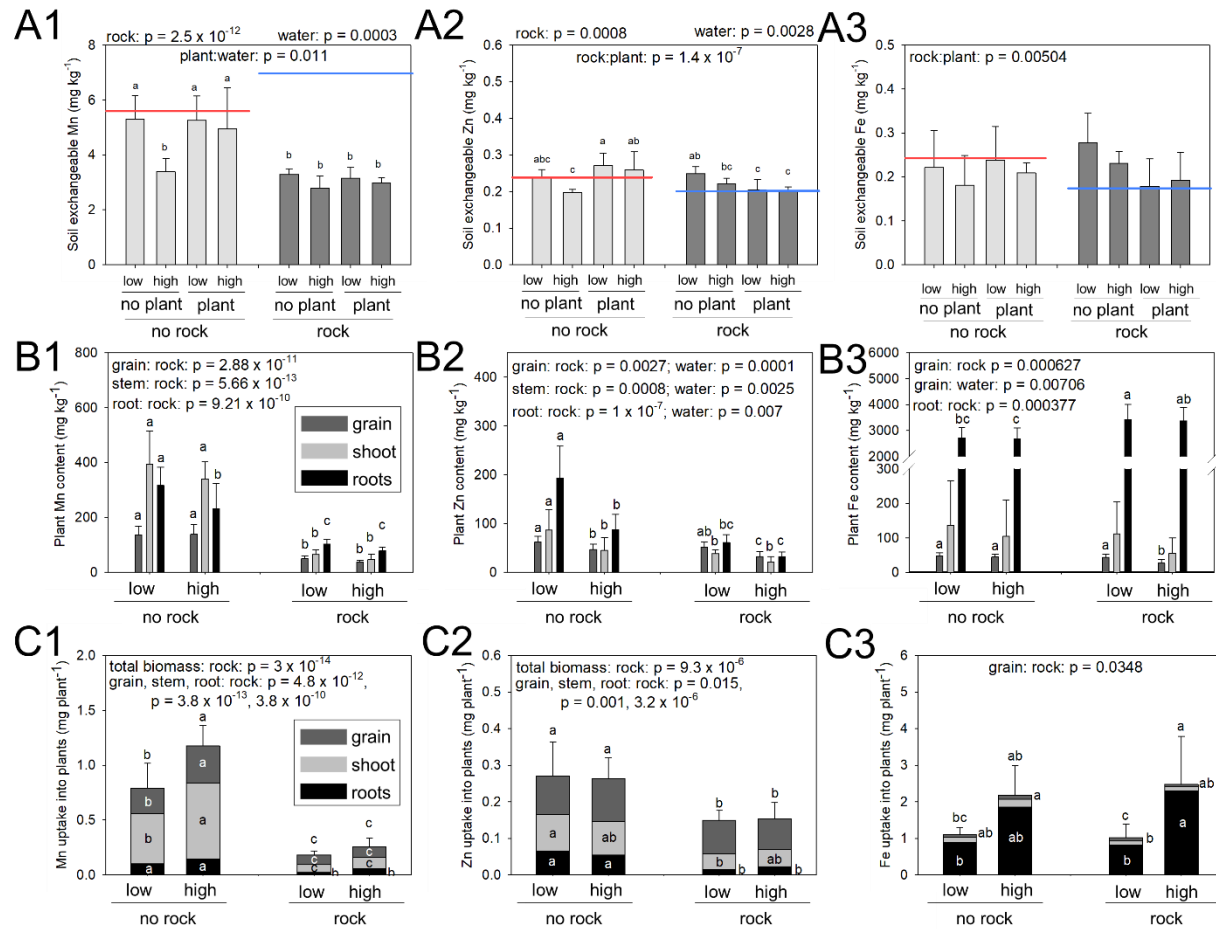

**Figure 2:** Micronutrients Mn (1), Zn (2) and (3) Fe in plant and soil at the end of 6-month incubation. (A) Ammonium acetate exchangeable contents for soils in all 8 treatments, and (B) plant tissue contents of grain, shoots and roots and (C) total plant uptake in grain, shoot and roots for the planted treatments. Red and blue lines indicate baseline values from the soil at the start of the trial without and with rock addition (~4%),

respectively. Main effects determined using one-way ANOVAs (results shown at the top of each figure). Different letters indicate significant differences among the treatments determined via Tukey post-hoc test.

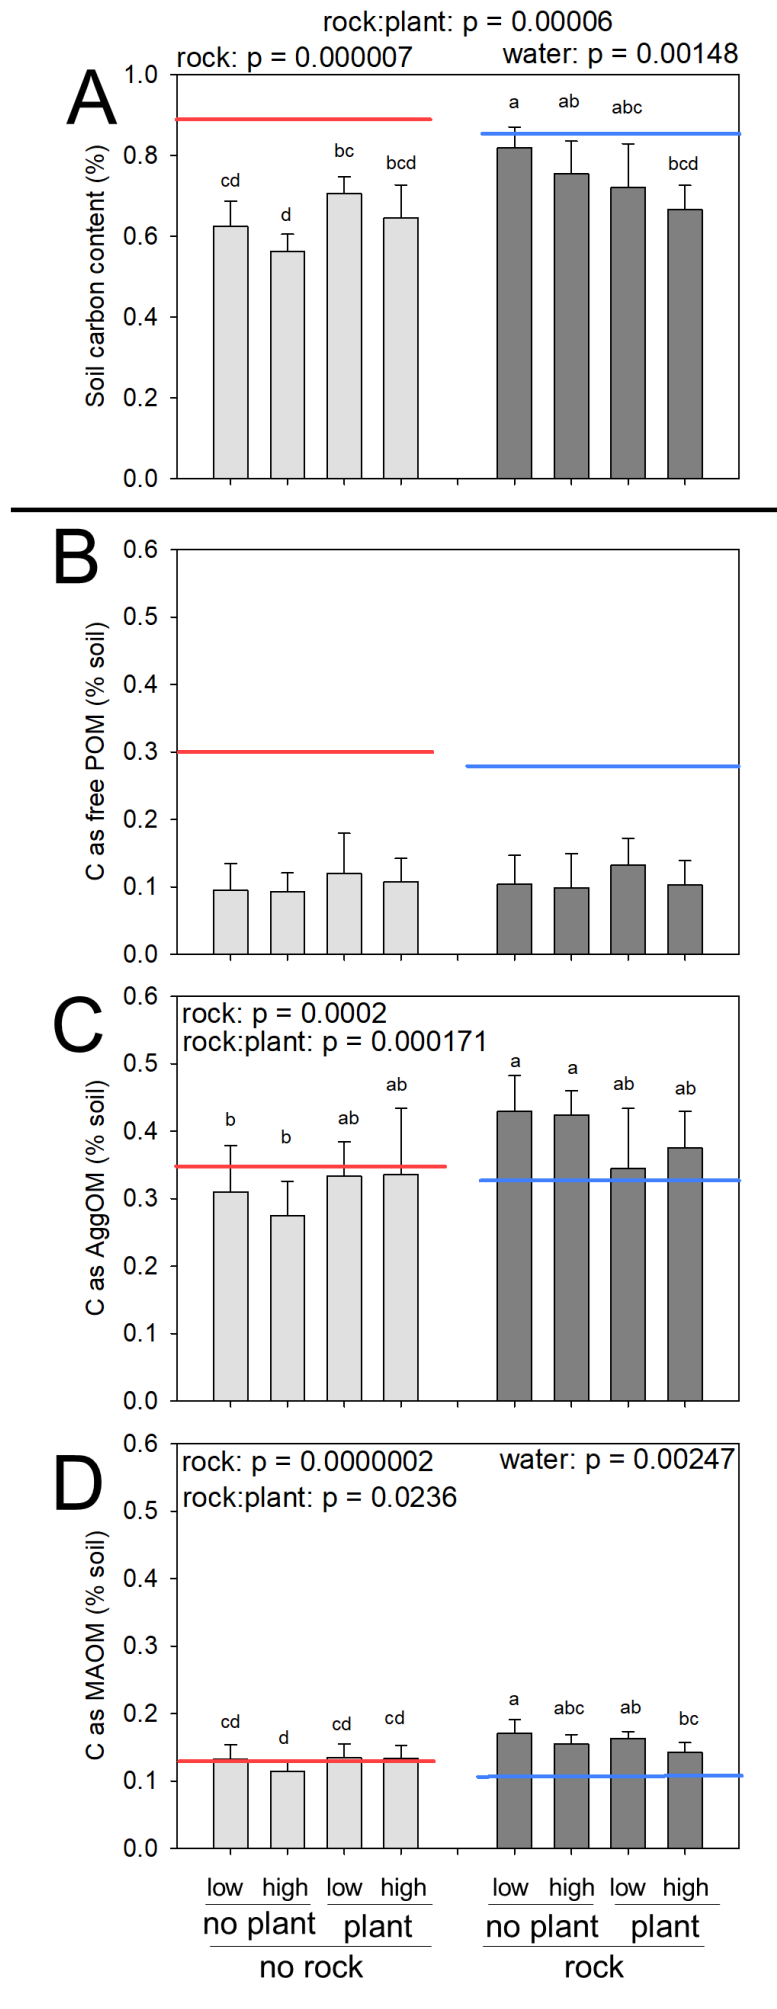

**Figure 3:** (A) Total soil carbon content and (B-D) three-pool soil carbon fractionation data at the end of 6-month incubation. (B-D) show carbon associated with (B) particulate organic matter (POM), (C) aggregate organic matter (AggOM) and (D) mineral-associated organic matter (MAOM). A full factorial design of high/low water, unplanted/planted soil and soil only/rock addition was used. Red and blue lines indicate baseline values from the soil at the start of the trial without and with rock addition (~4%), respectively. Main effects determined using one-way ANOVAs (results shown at the top of each figure). Different letters indicate significant differences among the treatments determined via Tukey post-hoc test.

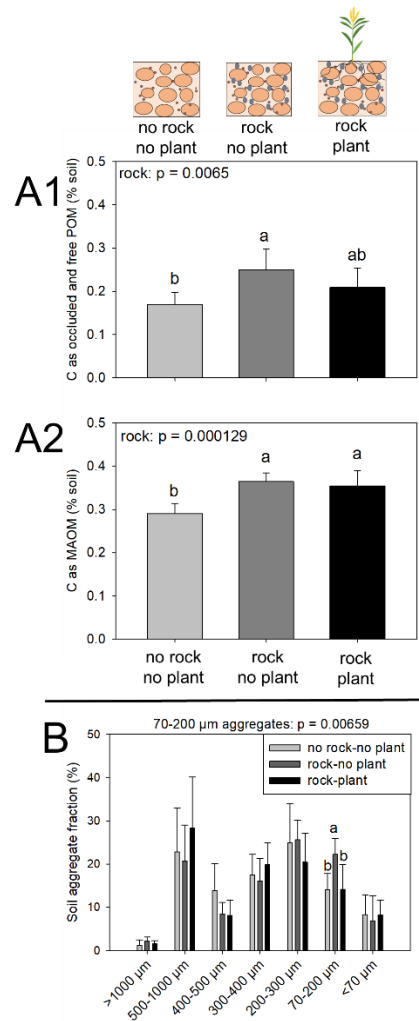

**Figure 4:** (A) Soil carbon occlusion determined via 2-pool soil fractionation and (B) soil aggregates in a subset of samples. Treatments: no rock without plant (control-control-low), rock with and without plants (all low water treatments). (A) Soil carbon fractionation using hexameta-phosphate extraction for full soil disaggregation at the end of a 6-months incubation. Carbon associated with the (A1) free and occluded POM fraction and (A2) MAOM fraction. Main effects determined using one-way ANOVAs (results shown at the top of each figure). Different letters indicate significant differences among the treatments determined via Tukey post-hoc test. (B) Soil aggregate classes. For statistical analysis (ANOVA, followed by Tukey's post-hoc test), data were centred log ratio transformed.



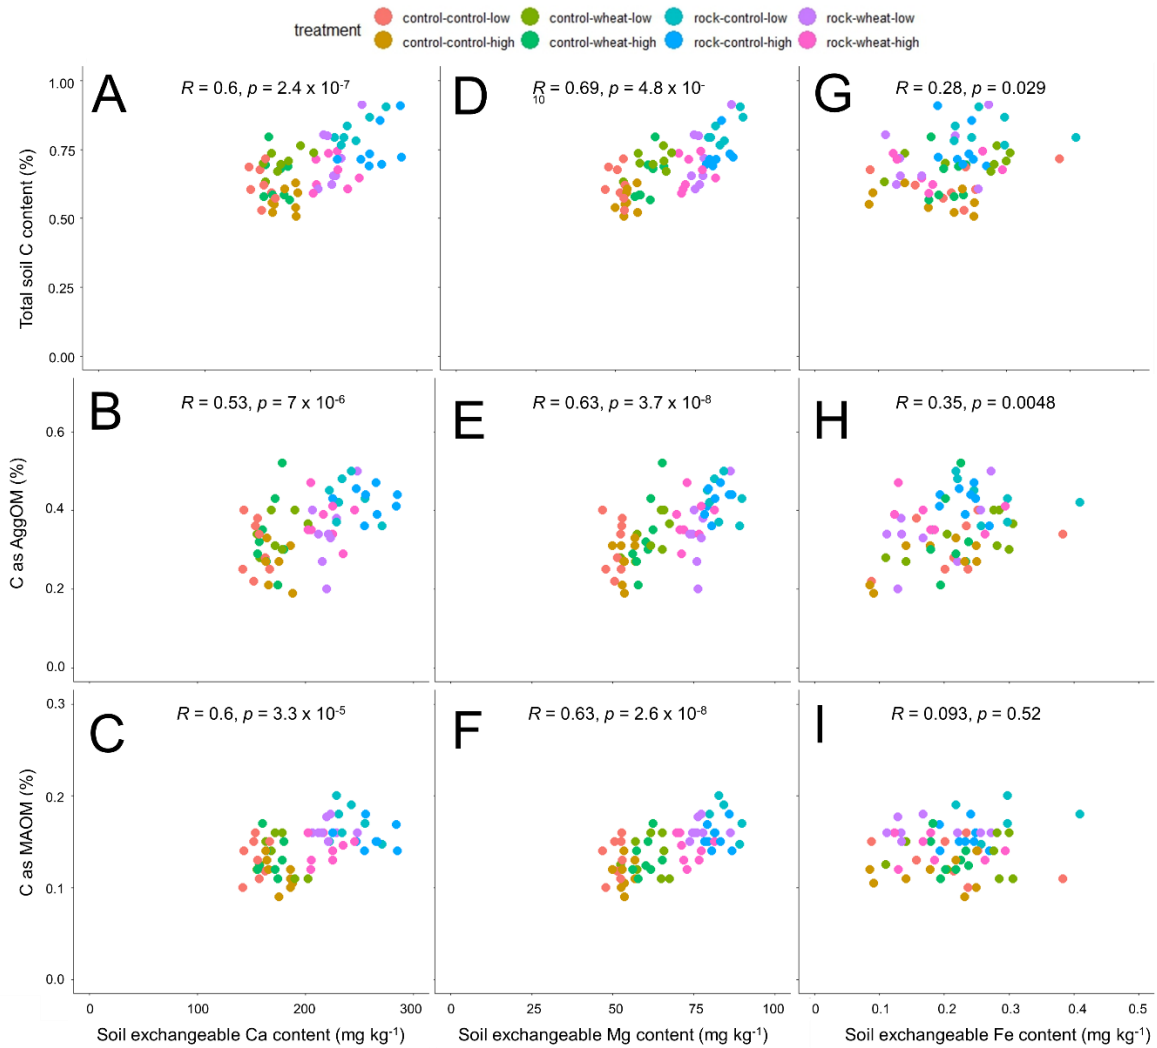

**Figure 5:** Relationship of soil exchangeable (A-C) Ca, (D-F) Mg and (G-H) Fe contents with (A, D, G) total soil C content, (B, E, H) C associated with AggOM and (C, F, I) C associated with MAOM at the end of 6-months incubation. Treatment labels are control/rock - control/wheat - low/high water. Pearson correlation coefficient and p-value shown, respectively.

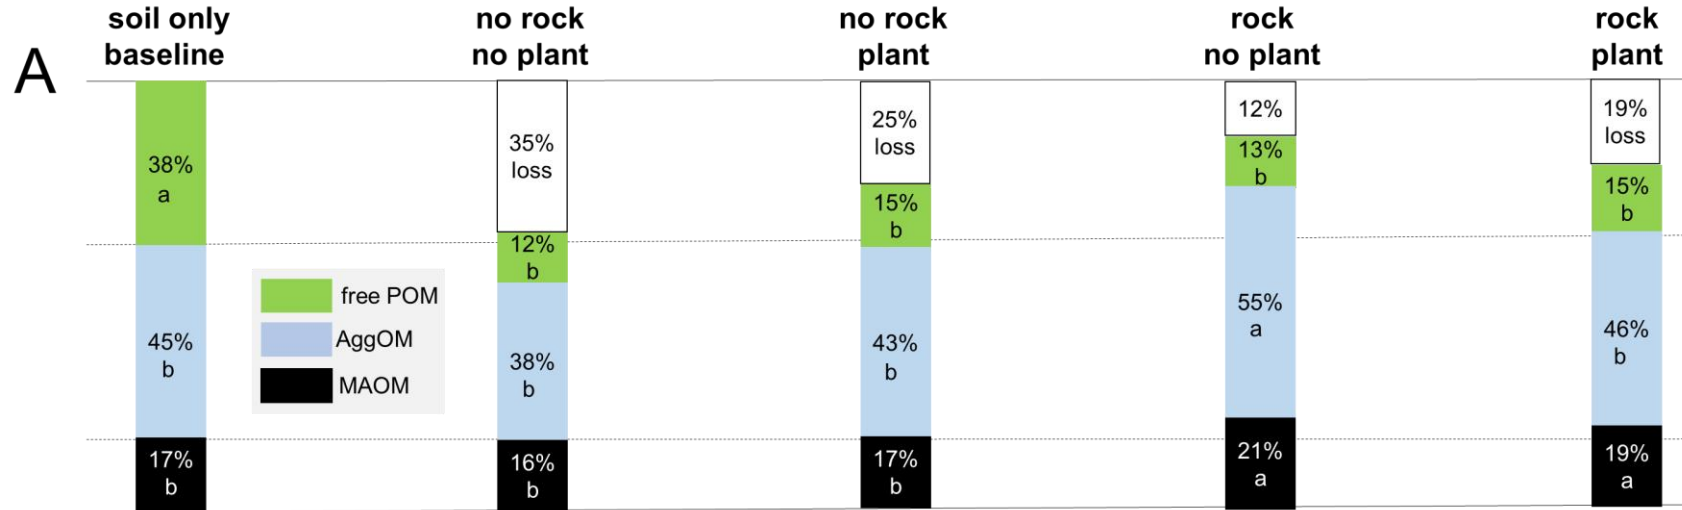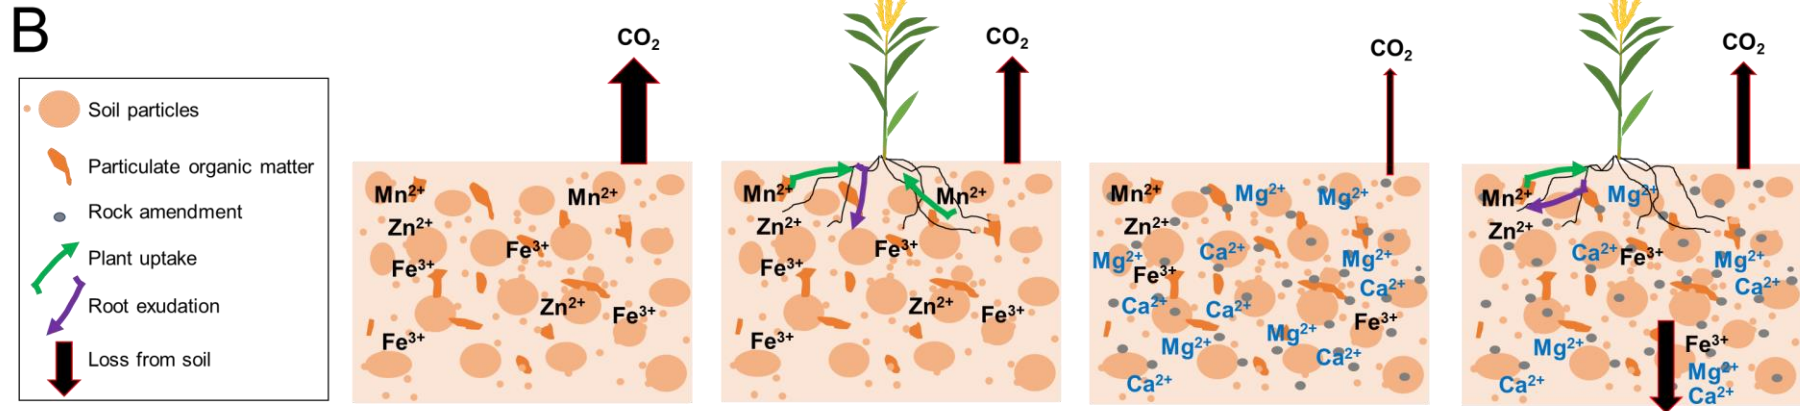

|                                                                |                                                                   |                                                                                   |                                                                                                           |                                                                                                                                                     |
|----------------------------------------------------------------|-------------------------------------------------------------------|-----------------------------------------------------------------------------------|-----------------------------------------------------------------------------------------------------------|-----------------------------------------------------------------------------------------------------------------------------------------------------|
| Soil micronutrient availability / plant uptake (Zn, Mn and Fe) | High / NA                                                         | High / high                                                                       | Low / NA                                                                                                  | Low / low                                                                                                                                           |
| Soil Ca and Mg availability                                    | Low                                                               | Low-medium                                                                        | High                                                                                                      | High-medium                                                                                                                                         |
| Soil POM content                                               | Low                                                               | Low                                                                               | Low                                                                                                       | Low                                                                                                                                                 |
| Soil AggOM content                                             | Unchanged                                                         | Unchanged                                                                         | High                                                                                                      | Unchanged                                                                                                                                           |
| Soil MAOM content                                              | Unchanged                                                         | Unchanged                                                                         | High                                                                                                      | High                                                                                                                                                |
| Hypothesis mechanisms behind SOM response                      | Limited protection of POM through aggregates and mineral surfaces | Plants increase carbon through exudation but soil provides limited POM protection | Mg and Ca increase POM stability through carbon protection in aggregates and sorption to mineral surfaces | Low Mn/Zn/Fe availability leads to plant exudation that solubilises and removes Ca, Mg and Fe from soil, which reduces POM protection in aggregates |

**Figure 6:** Summary of soil (carbon) responses to rock and plant additions relative to the soil baseline. (A) Conversion of SOM fractions in the baseline scenario (soil before trial) into other soil carbon fractions based on data in Figure 3 (low- and high-water treatments pooled together, n = 16). Letters show significant differences among the treatments. (B) Schematic summary of the key results.
